# Supplementary material for: Synthesis of anionic polymer–silica hybrids by controlling pH in an aqueous solution
Source: Royal Society of Chemistry journal article supplement (doi:10.1039/b411448e), 2004-10-15
Supplement: b411448e.pdf [file b411448e.pdf]

### Electronic Supplementary Information (ESI)

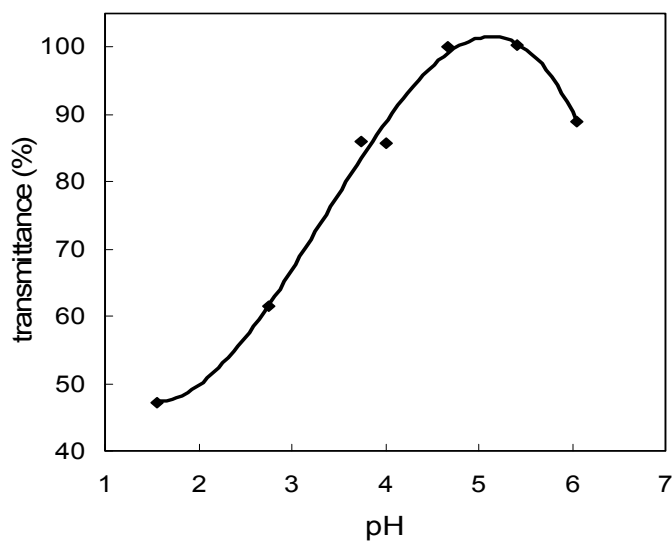

**Figure S1.** The transmittance of the PAA / silica hybrids at 400 nm depending on the pH in an aqueous solution. (The sample thickness is about 1  $\mu\text{m}$ .)

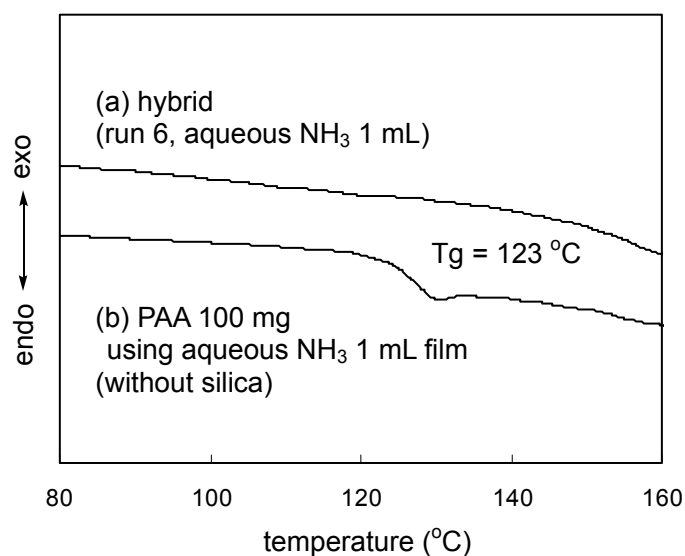

**Figure S2.** DSC thermograms of (a) the polymer hybrid (Table 1, run 6, PAA / silica = 5 / 1), and (b) PAA film with 1.0 mL of 1M aqueous  $\text{NH}_3$  solution.

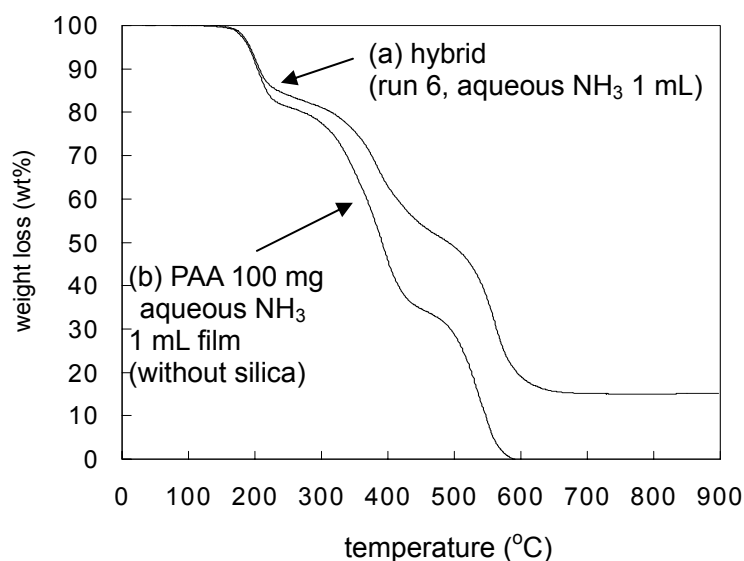

**Figure S3.** TGA traces of (a) the PAA / silica hybrid (Table 1, run 6) and (b) PAA with 1.0 mL of 1M aqueous  $\text{NH}_3$  solution.

**Table S1.** Effect of Solvents on Homogeneity<sup>a</sup>

| run | PAA (mg) | TMOS (mg) | solvent (mL)           | 10 wt% $\text{NH}_{3\text{aq.}}$ (mL) | appearance   |
|-----|----------|-----------|------------------------|---------------------------------------|--------------|
| 1   | 50       | 500       | $\text{H}_2\text{O}$ 3 | 0.03                                  | transparent  |
| 2   | 50       | 500       | $\text{H}_2\text{O}$ 3 | -                                     | turbid       |
| 3   | 50       | 500       | MeOH 3                 | 0.03                                  | precipitated |
| 4   | 50       | 500       | MeOH 3                 | -                                     | turbid       |

<sup>a</sup> Stirring time was 1 h, and the solvent was evaporated at 60 °C.

**Table S2.** Effect of the Base Additive on the Homogeneity<sup>a</sup>

| run | PAA (mg) | TMOS (mg) | base additive <sup>b</sup>      | appearance      |
|-----|----------|-----------|---------------------------------|-----------------|
| 5   | 50       | 250       | -                               | phase separated |
| 6   | 50       | 250       | $\text{NH}_{3\text{aq.}}$       | transparent     |
| 7   | 50       | 250       | diisopropylamine <sub>aq.</sub> | transparent     |
| 8   | 50       | 250       | triethylamine <sub>aq.</sub>    | transparent     |
| 9   | 50       | 250       | $\text{NaOH}_{\text{aq.}}$      | transparent     |

<sup>a</sup>  $\text{H}_2\text{O}$  3 mL, stirring time was 1 h, and the solvent was evaporated at 60 °C.

<sup>b</sup> 0.03 mL of 10 wt% aq. solution was used as a base additive.
